# Supplementary material
Source: PubMed Central journal article supplement (PMC2842120)
Supplement: NIHMS180228-supplement-Supplementary_Figure_1.pdf [file NIHMS180228-supplement-Supplementary_Figure_1.pdf]

### Supplementary Figure 1:

Identification of proteins currently not annotated as predicted genes in GeneDB database. These proteins were identified by comparison of MS/MS data to six frame translated genome sequence database and their corresponding polypeptide ID is shown. The identified peptide(s) are in red and possible start codons are in blue.

#### A. Proteins identified by two or more unique peptide matches.

Tb02.1051

MKKGDSATVARPIASRGSTV**M**ADGRASWEKLSRRHEENSKKKKILLYKLLHYE  
ASQLQIIIYVVEGEAYVFRKPKGDRAGYVTFYSNYKSAFTAVKQIIGESSGGEDIK  
GYLIFDVKDHHAPVKPPGDFSGIALSSPNVRQFHEWSKQNGATHIYINCDTLKD  
LEAIHISRWGIALAYGWSPSDAKEKIEREWQEIQARIRIVGPLL RHIVDSFWYKR  
QRELIREVIGK**MR**DDD**M**NDYAKIFQ**NAGM**WQTDEVSHKLVRAVRVVDGDPLC  
DAYRCRPLSSYTGQAILDFLRPWRTKKYALIS**GL**SNRALAAY**M**FENSGIEALS  
HEDALIELARELQGLSLEDQIPRSVLQVLQEPRLIGPSIEVPEDVPIVAGAEIEY**M**  
KLYKPQSR**SFPVVD**A**FFV**EN**PK**TFVGLQYTISGSHPCSTGGLFKMKRCLQSYFR  
RWDNFSNDMVWEIYVQRVDDERITKPQCCSRTATDEQSKREERFWKREVR**QFS**  
**VSLNER**I**AL**YVECKEKLEEYDRNNGVNNGGGNA

Tb03.13564

GVGGDAAESTSDYGLTRRKGCRRCVEALKRRRYCGEYGSRTQIT**MR**GDPRCR  
NRVVERIN**ATIAQLDK**R**L**KALETERAERGNEAHGAAAYSSQFFMEKDSR**NAVPP**  
**LVEGFIPSRAVLT**D**IED**R**LC**YLEAALKTGNTLPSSRRVPRLPERDLPPIVGAPHPPG  
AAPLQGEAGGEPSTSTSKERQASERAASNGTSNGIPPIQGHRCDVSNPSAGNSS  
SAGVSQGRHAVDDGSVLRQRVDKLEERASVLEKKKADRREVQQLEEFVEELAR  
RSLGPLQTGPVPSNMQENAQLGYSDDVLGMGRGSRKVGTAAPLMRSVFVVGMG  
TQLNDSTGSKTSATVANPRQL

Tb03.2365

LVAVKEIS**M**KNSVARTQPVRKYENFTLENNLPLALGANFHDDPICRDTNRTSHTL  
LLPRNVDYAPHTEYVFNGGGFNRENK**M**RTIDEEFVDEDEPVFDGW**MT**VNFDNP  
DDAKDHVVSFLAYFVEDIPEGTETKIVRKVCIR**Y**YT**Q**D**NSISVQEAKQ**Q**NSGIVQ**  
**STILSR**RQVPRRMDNINDIVMLEDFQIGGTITLFSREYHILDMDARSRLYYKK**VLG**  
**QTVPEPLPWPIEIDK**FTTMQAQLSKSTHRLATSEDMDQK**RAIEQQ**L**TGIYTK**HPTE  
DILTAQNFLRHNINEHLTFLALWDDRESLSGDLRFVVIRLYLENNTVEIERRQEN  
SGRMGSSVILGRQRVARPGAEGSKIRFQEHTFGVILKRDFLVAEDMKVGETYHHI  
GR**PYFIYDADEA**TRRYMKNELGTDESPNDFGKNH

Tb03.2385

GDLSELGIELAPCVDIKPILASDEKKPIIFFPPPNGFGSERENRSSLTLNPRP**M**RR  
DVEKIEKEEGRV**M**NFLAELANPLVRGDEKRRFVISFFRETDE**M**SIYEKPERNSGY

LAGRFLAKGVYRKPM**MP**DGSTVPYTAEDFQVGKEITILERPFRL**LD**MSEETKR**ILT**  
VTEQL**PSEQ**RLKELLLL**FKQ**QIQ**LK**FTRGHEAYCTLAPK**GV**LG**YR**QVREFLRSCS  
CSITEDEALLVHNLVPSSAGVISFNEFM**DL**VNITSSEHMDEASLTVRSVKS**VNM**  
TKDESLKTV**AIK**TEDVKRRKQLA**VEL**RQK**L**IQ**RK**GSVQE**Q**FRLIGCHSASSRLNR  
DVFRHSLNEVMHFNV**PK**T**DE**D**ML**V**SLL**F**DGR**ADENG**D**ITYK**Q**FQEFLEV**Q**DDI

Tb03.9263

YFSQQSGK**LK**KK**HK**QEEM**M**FCVSAARLTALASHQ**P**ILPPSVSTRVAV**M**RFLGDGR  
SR**MP**N**INT**IN**TL**ITKT**GAK**GLAG**NA**S**VL**G**K**AMFY**LK**R**GN**P**V**GA**IA**EID**K**IL**PE**IS**D**  
D**AL**K**R**FAV**G**IR**L**RARNDLLDM**K**ESAL**K**VHGGIT**E**LEVSDIR**T**ALR**DD**Y**K**VLEAA  
SPGCWLFELAVAEYRLYEGCA**K**DAYDS**F**RLVE**K**SI**Q**E**Y**IL**SL**KK**P**SPSQALHGTD  
NHASLV**L**AFQ**L**SRARTPN**V**PKVSS**K**IVDEAIKGIVEGYSTKEATLAF**K**KDLGAAL  
TDEEV**V**ELVYIFEAAHIRHHFHDYFPLHEDYRGWG**S**ERANA**A**K**G**TLASHSTSSV  
FLDDKLLASIRTSVPHQPFYAGEDELRRFMSSDH**K**DLIAELRHTFGSGPK**T**SLAK**S**  
E**D**A**Y**F**D**AL**K**AVEN**S**PMSADAAG**S**AA**Y**PVSQNDICL**C**LAQQL**L**YR**T**R**V**NI**A**VA**L**T  
Q**L**D**R**LEEAV**P**ILD**G**VINADEYI**Y**MWRALLARGE**A**NK**R**FGHIG**K**SDED**F**RQL**L**Q**L**  
KRITSADA

Tb10.19077

SNGTLLAGGV**P**WFLFLFFLSL**P**SR**M**GTKENAT**K**V**V**AG**N**Y**P**Y**S**S**V**AR**G**EHLV**S**HR  
SPPRALKWLAPAALLFAAGGFYFTCRW**N**NERAKD**G**PCIN**C**K**R**Q**Q**E**I**I**E**V**Y**F**N**K  
QTVQ**K**GNRL

Tb11.6536

**M**AVPR**W****M**RRFEI**Y**AV**C****M**IWP**I**STIVG**I**VG**T**Y**K**LF**M**WSY**G**GRDC**F**R**Y**V**V**IE**P**MK  
GQWFQAN**P**K**S**AL**G**MD**T**PL**A**N**V**PK**F**LETS**P**YTYDDNT**G**SD

Tb05.10600

RGICSVTRGGGRSQR**S**ISEYCHAALNLKSLNT**M**VNSALCKTLLEPLRTNPLL**G**VC  
VATGCVNAFI**Y****M**WYTR**S**T**S**ATLRASRE**K**CQAVSENA**F**AKSRAL**M**KELEEDWAR  
DIKARDASVR**R**LE**L**Q**N**VE**Q**TRSIARLDAAM**K**FCLTPGST**V**S**Q**

**B.** Proteins that were identified by one peptide and showed sequence homology to *Leishmania* and/or *T. cruzi* predicted proteins.

Tb02.1333

I**M**Y**V**V**S**G**K**A**Y**VFR**K**PK**G**DRAGY**V**TFY**S**NYDDASTLIGQ**I**VRD**S**CGAEN**I**K**G**Y**V**I  
FDVDKNHP**A**PT**K**PP**G**DFAGIALSS**P**N**V**R**Q**FH**G**W**S**K**Q**N**K**ALHFYIN**C**DT**L**K**D**LE**V**I

HISRWGKIAPAYGWNPSDAKEKIESEWQEIQDRIPVGPLLRHIVDSASFTRQCDLI  
EEAINEMSDVKKESYAKIFQNAATWQTRKASHRLVRVVRVKKGNLLCDSYLCT  
PLSSYTGVILDFLRPWLLNKYAAISALLSNCAIVGHLFEKSGIEALSHENTLTEL  
ARELQGLSFAGDQIQSVLQVLQGPRLTNPLIVVPEDVPIVAGAEIQYMKLYKPQ  
SRSPVVDAFFFVENPKTFVGLQYTISGSHPCSTGGFLFKMKRCLQSYFRRWDNFS  
RGMVWEIIVQRVDSEKITKQCCEGTIEDGGQNNKVEERFCEQEVRFQFAVSLSN  
HITALYVELQVKGNNNNGVNNRGGNA

Tb03.13559

NSSKTRPPTHPTKEIMTVMDVDATAIPDMIQAQLTSLYSRLTQLIRLIVDQGNH  
DMDIGKIMNRLDALAKENAELRKRVDDELTTMRCGGVNEEVAVLKREVAIVQ  
ELCTENTKRLTSSEGINERRFVKLEEAIVSTVSDTGTETQRLDGCITELRSENLEM  
KKDVGCLNDFVALWDGHVEKIRALTTRDSEGNLQHAHERARYLHSLPPFTKLF  
EELEVMRQLNRHQTTDSLAAKGVVGVLRSSVGDIAGNTDPAPKSPCVATPAAE  
TESWRESMPPSLSWTNG

Tb10.31367

KGKHNSLHSDTRKKCCMINPPEESEDANAPLDRLAAHLRAPPTPPKVPVYALP  
DQPYLETTVLPLLLRGLLEEVVKVRPADPLAFLAAYLSSNNPQRVSHPLLTEEGR  
VPLQEIAQRAADVILQLAYQPPAQP

Tb11.38944

GLIDVTTMEVSADTQALSEAMMIRLIEEQIWCGYEDVETAVNASCEGENVTYLR  
ENVFPTLVPALYELVKRQQQCALEPDEVSHRYGPTGNTHPISWLSQYLLRNTR  
HSKKICGHPYVMVNNELLRKEKGTRTKES

C. Proteins that were identified with one peptide match and had no sequence homology to annotated *Leishmania* or *T. cruzi* predicted proteins.

11L3.0325

RMYSRTQTSVRWQVGWQKGNKWWMGPGGLINTQQWKLQQKLSLTAVNRWK  
CVPQPRGQL

Tb03.5811

MPETPQRNGFKRPSLAAKLFGDADVYSRETTSSLTDFAGTFLVGFFAVYFTIAG  
YLLYREAALS

Tb11.13923

SLRLISSDRILYATSTFAM**Y**SLAFSFA**S**AP**S**CM**S**GWCSR**V**IVRNAR**L**IS**A**F**V**EP**R**D  
TPSRPYRSRSLGCPKMEAFVTFGVKDNC**S**VTNSKHIM**L**IEDKCNCMILHS**V**SL**F**
