# Supplementary material
Source: PubMed Central journal article supplement (PMC2842120)
Supplement: NIHMS180228-supplement-Supplementary_Figure_2.pdf [file NIHMS180228-supplement-Supplementary_Figure_2.pdf]

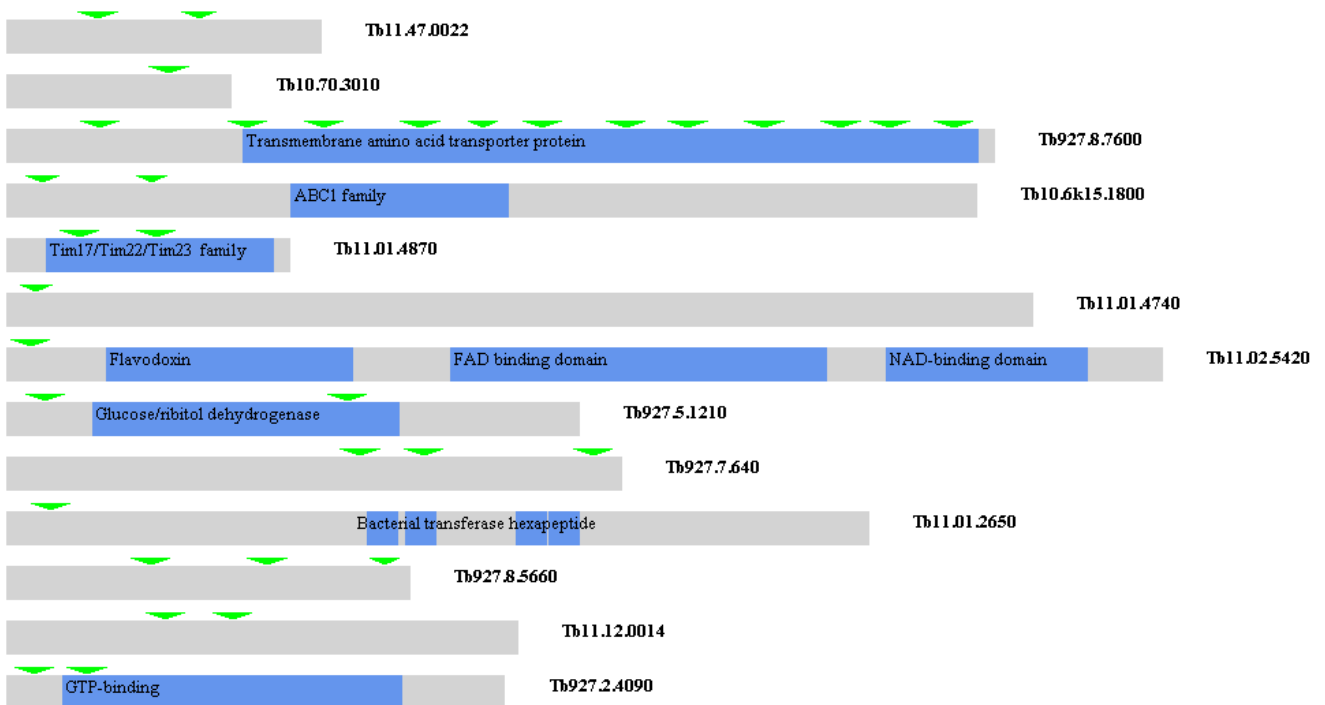

**Supplementary Figure 2.** Schematic representation of the thirteen proteins assigned to mitochondrial membranes. The domain structure for each of the proteins are represented to scale. Green arrows indicate putative TMD and predicted motifs are in blue.
